# Supplementary material for: Using LLMs and Explainable ML to Analyze Biomarkers at Single-Cell Level for Improved Understanding of Diseases
Source: MDPI journal article supplement (doi:10.3390/biom13101516), 2023-10-12
Supplement: s1 [file s1]

---

# Using LLM Models and Explainable ML to Analyse Biomarkers at Single Cell Level for Improved Understanding of Diseases

---

Jonas Elsborg<sup>1, 2, +</sup> and Marco Salvatore<sup>2, +, \*</sup>

<sup>1</sup>Department of Energy Conversion and Storage, Technical University of Denmark, 2800 Kongens Lyngby, Denmark

<sup>2</sup>Abzu ApS, Orient Plads, Copenhagen, 2150, Denmark

\*marco.salvatore@abzu.ai

<sup>+</sup>these authors contributed equally to this work

September 26, 2023

**Keywords**— biomarker, LLM, interpretability, scRNA-seq, machine learning, symbolic regression

## A Supplementary Information

| Train ID | Test ID | Cell Type                   | Dominant Features | PR AUC    | Score | Count      | UC Fraction |
|----------|---------|-----------------------------|-------------------|-----------|-------|------------|-------------|
| D1       | D5      | Cycling B cell              | CHI3L2,ESCO2      | 1.0/0.98  | 0.97  | 13/77      | 38%/3%      |
| D1       | D2      | Pericyte                    | RPL39, COL6A3     | 0.97/0.96 | 0.96  | 1039/260   | 13%/8%      |
| D1       | D2      | arterial capillary          | RPL39,PLAT        | 0.95/0.94 | 0.94  | 1814/559   | 28%/22%     |
| D1       | D2      | Mature venous EC            | RPL39,PLAT        | 0.96/0.94 | 0.93  | 2457/713   | 15%/13%     |
| D1       | D3      | Goblet cell                 | LYZ, LGALS4       | 0.94/0.92 | 0.91  | 1714/325   | 26%/38%     |
| D1       | D2      | Stromal 4(MMP1+)            | LGALS1,IGFBP 3    | 1.0/0.94  | 0.91  | 1111/569   | 1%/7%       |
| D1       | D3      | Stem cells                  | CD74,ERRFI1       | 0.96/0.92 | 0.90  | 123/102    | 21%/19%     |
| D1       | D2      | Mature arterial EC          | RPL39,PLAT        | 0.96/0.92 | 0.90  | 702/118    | 15%/18%     |
| D1       | D3      | IgA plasma cell             | LCN2,FABP1        | 0.92/1.0  | 0.88  | 1182/46    | 25%/4%      |
| D1       | D3      | TA                          | B3GNT7,FABP1      | 0.95/0.89 | 0.86  | 14930/2821 | 35%/36%     |
| D1       | D3      | cDC2                        | LCN2,HMGB2        | 0.87/0.91 | 0.85  | 81/11      | 21%/18%     |
| D1       | D5      | Contractile pericyte (PLN+) | CAV1,APOE         | 0.89/0.86 | 0.84  | 277/11     | 17%/27%     |
| D1       | D3      | BEST 2+ Goblet cell         | LYZ, FABP1        | 0.96/0.88 | 0.84  | 11444/1436 | 24%/42%     |
| D1       | D3      | EC cells (TAC1+)            | FABP1,HEXIM1      | 0.97/0.86 | 0.80  | 125/66     | 19%/26%     |
| D1       | D3      | Colonocyte                  | B3GNT7,LCN2       | 0.87/0.82 | 0.80  | 51235/4815 | 43%/42%     |
| D1       | D3      | BEST4+ epithelial           | DST,AGR2          | 0.89/0.82 | 0.78  | 2801/299   | 34%/35%     |
| D1       | D2      | myofibroblast               | TM4SF1,RPL39      | 0.97/0.82 | 0.74  | 1189/105   | 16%/45%     |
| D1       | D2      | Fetal arterial EC           | ARRB2,PASK        | 0.98/0.82 | 0.74  | 63/15      | 5%/27%      |
| D1       | D2      | Adult Glia                  | RPL39,SCN7A       | 0.79/0.75 | 0.73  | 1478/617   | 45%/42%     |
| D1       | D2      | Contractile pericyte (PLN+) | CAV1,APOE         | 0.89/0.75 | 0.68  | 277/243    | 17%/27%     |

**Table 1:** Summary of the performance of all obtained models for Dataset 1 on different cell types. This table provides a comprehensive overview of our model’s performance across diverse cell types, employing various features and evaluating through PR AUC. The "Dominant Features" column highlights the gene that consistently emerges as the most frequent among the 10 models generated by the QLattice. The "Score" column in the table represents the transferability-corrected performance score explained in details in the method section. Furthermore, the "UC Fraction" column delineates the proportion of cell types corresponding to disease samples within both the training and test datasets.

| Train ID | Test ID | Cell Type                   | Dominant Features | PR AUC    | Score | Count     | UC Fraction |
|----------|---------|-----------------------------|-------------------|-----------|-------|-----------|-------------|
| D2       | D1      | mLTo                        | MT2A,C7           | 1.0/1.0   | 1.00  | 37/185    | 49%/2%      |
| D2       | D1      | myofibroblast (RSPO2+)      | CXCL1,IFI16       | 1.0/0.98  | 0.97  | 10/294    | 40%/3%      |
| D2       | D1      | Stromal 4(MMP1+)            | RPS4Y1,IFI27      | 0.97/1.0  | 0.96  | 569/1111  | 7%/1%       |
| D2       | D1      | Fetal arterial EC           | GJA4,IFI27        | 1.0/0.97  | 0.96  | 15/63     | 27%/5%      |
| D2       | D1      | Fetal venous EC             | TM4SF1,COL6A2     | 1.0/0.96  | 0.94  | 11/13     | 36%/23%     |
| D2       | D1      | Stromal 3(C7+)              | CXCL1,RPS 4Y1     | 0.99/0.96 | 0.94  | 18/347    | 33%/4%      |
| D2       | D1      | myofibroblast               | RPS 4 Y1,APOC1    | 0.94/0.92 | 0.91  | 105/1189  | 45%/16%     |
| D2       | D1      | <i>T</i> reticular          | IFI27, CLU        | 0.92/0.9  | 0.89  | 75/2101   | 49%/20%     |
| D2       | D1      | Stromal 1 (ADAMDEC1+)       | CFD,RPS 4Y1       | 0.96/0.9  | 0.87  | 219/5626  | 23%/28%     |
| D2       | D1      | Pericyte                    | RPS 4Y1,IFI27     | 0.96/0.88 | 0.84  | 260/1039  | 8%/13%      |
| D2       | D1      | Mature arterial EC          | RPS4Y1,HLA-DRB1   | 0.95/0.87 | 0.83  | 118/702   | 18%/15%     |
| D2       | D1      | Mature venous EC            | RPS 4Y1,C7        | 0.95/0.85 | 0.80  | 713/2457  | 13%/15%     |
| D2       | D1      | Contractile pericyte (PLN+) | IFI27, FABP4      | 0.97/0.86 | 0.80  | 243/277   | 27%/17%     |
| D2       | D5      | Contractile pericyte (PLN+) | IFI27, FABP4      | 0.97/0.83 | 0.76  | 243/11    | 27%/27%     |
| D2       | D1      | Stromal 1(CCL11+)           | RPS 4 Y 1,CFD     | 0.93/0.82 | 0.76  | 2479/5193 | 26%/36%     |
| D2       | D1      | Transitional Stromal 3(C3+) | PDLIM3,TNFRSF12A  | 0.74/0.85 | 0.68  | 30/56     | 7%/23%      |
| D2       | D1      | arterial capillary          | RPS4Y1, CABP1     | 0.95/0.75 | 0.65  | 559/1814  | 22%/28%     |
| D2       | D1      | Stromal 2(NPY+)             | PLAT,RPS 4Y1      | 0.96/0.74 | 0.63  | 2584/6813 | 43%/35%     |
| D2       | D1      | Adult Glia                  | CD74,TNFSF13B     | 0.99/0.63 | 0.45  | 617/1478  | 42%/45%     |
| D2       | D5      | IgA plasma cell             | CXCL1,HLA-DRB1    | 0.51/0.43 | 0.39  | 460/7597  | 5%/42%      |

**Table 2:** Summary of the performance of all obtained models for Dataset 2 on different cell types. This table provides a comprehensive overview of our model’s performance across diverse cell types, employing various features and evaluating through PR AUC. The ”Dominant Features” column highlights the gene that consistently emerges as the most frequent among the 10 models generated by the QLattice. The ”Score” column in the table represents the transferability-corrected performance score explained in details in the method section. Furthermore, the ”UC Fraction” column delineates the proportion of cell types corresponding to disease samples within both the training and test datasets.

| Train ID | Test ID | Cell Type          | Dominant Features    | PR AUC    | Score | Count      | UC Fraction |
|----------|---------|--------------------|----------------------|-----------|-------|------------|-------------|
| D3       | D1      | BEST2+ Goblet cell | LCN2,FABP1           | 0.92/0.94 | 0.91  | 1436/11444 | 42%/24%     |
| D3       | D1      | TA                 | FABP1,LCN2           | 0.93/0.91 | 0.90  | 2821/14930 | 36%/35%     |
| D3       | D1      | Stem cells         | LCN2,DDIT4           | 0.92/0.88 | 0.86  | 102/123    | 19%/21%     |
| D3       | D5      | Treg               | CCL5,CD69            | 0.96/0.87 | 0.82  | 121/4304   | 8%/15%      |
| D3       | D1      | EC cells (TAC 1+)  | RPS 4Y1, <i>MT1G</i> | 0.91/0.85 | 0.82  | 66/125     | 26%/19%     |
| D3       | D1      | Goblet cell        | LCN2, S100P          | 0.94/0.84 | 0.79  | 325/1714   | 38%/26%     |
| D3       | D5      | Naive B            | HSPA2,GPM6B          | 1.0/0.84  | 0.76  | 41/550     | 2%/17%      |
| D3       | D5      | Tfh                | FAM43A,FAM167B       | 1.0/0.83  | 0.74  | 25/53      | 4%/19%      |
| D3       | D5      | gdT                | LGALS1,HLA-DPA1      | 0.89/0.78 | 0.72  | 86/293     | 35%/28%     |
| D3       | D1      | Colonocyte         | CKB,LCN2             | 0.9/0.78  | 0.72  | 4815/51235 | 42%/43%     |
| D3       | D1      | CDC2               | FABP1,NLRP3          | 1.0/0.81  | 0.72  | 11/81      | 18%/21%     |
| D3       | D5      | TRGV4 gdT          | ZFP36L2, BIRC3       | 1.0/0.79  | 0.68  | 27/57      | 48%/30%     |
| D3       | D5      | Memory B           | ABHD5,IGFBP2         | 0.96/0.75 | 0.64  | 183/3139   | 5%/25%      |
| D3       | D5      | NK cell            | RPS 4 Y 1,KLRB1      | 0.95/0.74 | 0.64  | 78/831     | 46%/31%     |
| D3       | D1      | IgA plasma cell    | KLF2,MT1M            | 0.99/0.76 | 0.64  | 46/1182    | 4%/25%      |
| D3       | D5      | SELL + CD4 T       | NR4A2, NABP1         | 1.0/0.75  | 0.62  | 12/2739    | 17%/26%     |
| D3       | D1      | BEST4+ epithelial  | ISG20,S100P          | 0.93/0.69 | 0.57  | 299/2801   | 35%/34%     |
| D3       | D5      | CDC2               | FABP1,NLRP3          | 1.0/0.62  | 0.43  | 11/192     | 18%/43%     |
| D3       | D5      | Activated CD8 T    | CCL5,NR4A2           | 0.9/0.58  | 0.42  | 460/3212   | 43%/41%     |
| D3       | D5      | Mast cell          | RPS4Y1,SAMSN1        | 1.0/0.51  | 0.26  | 26/16      | 38%/31%     |

**Table 3:** Summary of the performance of all obtained models for Dataset 3 on different cell types. This table provides a comprehensive overview of our model’s performance across diverse cell types, employing various features and evaluating through PR AUC. The ”Dominant Features” column highlights the gene that consistently emerges as the most frequent among the 10 models generated by the QLattice. The ”Score” column in the table represents the transferability-corrected performance score explained in details in the method section. Furthermore, the ”UC Fraction” column delineates the proportion of cell types corresponding to disease samples within both the training and test datasets.

| Train ID | Test ID | Cell Type                   | Dominant Features | PR AUC    | Score | Count     | UC Fraction |
|----------|---------|-----------------------------|-------------------|-----------|-------|-----------|-------------|
| D5       | D3      | Treg                        | RPL39,CD7         | 0.95/0.98 | 0.94  | 4304/121  | 15%/8%      |
| D5       | D3      | Tfh                         | DDIT4,PPP1R3E     | 0.89/0.98 | 0.85  | 53/25     | 19%/4%      |
| D5       | D3      | Memory B                    | RPS4Y1,ADAM28     | 0.87/0.97 | 0.82  | 3139/183  | 25%/5%      |
| D5       | D3      | Naive B                     | RPS4Y1,GEM        | 0.88/0.99 | 0.82  | 550/41    | 17%/2%      |
| D5       | D3      | gdT                         | RPL39,CD74        | 0.93/0.86 | 0.82  | 293/86    | 28%/35%     |
| D5       | D3      | Activated CD8 T             | RPL39,KLF2        | 0.82/0.84 | 0.81  | 3212/460  | 41%/43%     |
| D5       | D1      | cDC2                        | LYZ,RPL39         | 0.81/0.83 | 0.80  | 192/81    | 43%/21%     |
| D5       | D3      | SELL+ CD4 T                 | CCL5,CD3D         | 0.85/0.96 | 0.80  | 2739/12   | 26%/17%     |
| D5       | D1      | IgA plasma cell             | RPL39,CD79A       | 0.85/0.81 | 0.79  | 7597/1182 | 42%/25%     |
| D5       | D3      | IgA plasma cell             | RPL39,CD79A       | 0.85/1.0  | 0.78  | 7597/46   | 42%/4%      |
| D5       | D3      | TRGV4 gdT                   | CD8A,NR4A2        | 0.98/0.83 | 0.76  | 57/27     | 30%/48%     |
| D5       | D1      | Contractile pericyte (PLN+) | MFGE8,CFD         | 1.0/0.84  | 0.76  | 11/277    | 27%/17%     |
| D5       | D1      | Activated T                 | GZMA,CD74         | 0.88/0.78 | 0.73  | 757/37    | 30%/49%     |
| D5       | D3      | CDC2                        | LYZ,RPL39         | 0.81/0.98 | 0.72  | 192/11    | 43%/18%     |
| D5       | D3      | Activated CD4 T             | RPL39,KLF2        | 0.76/0.86 | 0.71  | 6154/39   | 38%/31%     |
| D5       | D2      | Contractile pericyte (PLN+) | MFGE8,CFD         | 1.0/0.78  | 0.67  | 11/243    | 27%/27%     |
| D5       | D3      | NK cell                     | RPL39,GZMB        | 0.9/0.64  | 0.51  | 831/78    | 31%/46%     |
| D5       | D3      | Mast cell                   | STMN1,ZFP36L2     | 0.94/0.63 | 0.47  | 16/26     | 31%/38%     |
| D5       | D1      | Cycling B cell              | SYTL2,MZB1        | 0.99/0.42 | 0.14  | 77/13     | 3%/38%      |
| D5       | D2      | IgA plasma cell             | RPL39,CD79A       | 0.85/0.18 | -0.16 | 7597/460  | 42%/5%      |

**Table 4:** Summary of the performance of all obtained models for Dataset 4 on different cell types. This table provides a comprehensive overview of our model’s performance across diverse cell types, employing various features and evaluating through PR AUC. The ”Dominant Features” column highlights the gene that consistently emerges as the most frequent among the 10 models generated by the QLattice. The ”Score” column in the table represents the transferability-corrected performance score explained in details in the method section. Furthermore, the ”UC Fraction” column delineates the proportion of cell types corresponding to disease samples within both the training and test datasets.
